# Supplementary material for: Validating Use of Electronic Health Data to Identify Patients with Urinary Tract Infections in Outpatient Settings
Source: PubMed Central journal article supplement (PMC7558992; doi:10.3390/antibiotics9090536), 2020-08-25
Supplement: antibiotics-09-00536-s001.pdf [file antibiotics-09-00536-s001.pdf]

## Supplement material

Article

# Validating Use of Electronic Health Data to Identify Patients with Urinary Tract Infections in Outpatient Settings

George Germanos <sup>1</sup>, Patrick Light <sup>2</sup>, Roger Zoorob <sup>1</sup>, Jason Salemi <sup>1</sup>, Fared Khan <sup>1</sup>, Michael Hansen <sup>1,\*</sup>, Kalpana Gupta <sup>3</sup>, Barbara Trautner <sup>4,5</sup> and Larissa Grigoryan <sup>1</sup>

<sup>1</sup> Department of Family and Community Medicine, Baylor College of Medicine, Houston, TX 77030, USA; george@germanos.md (G.G.); roger.zoorob@bcm.edu (R.Z.); jsalemi@usf.edu (J.S.); fared.khan@bcm.edu (F.K.); grigorya@bcm.edu (L.G.)

<sup>2</sup> Baylor College of Medicine, Houston, TX 77030, USA; patrick.light@bcm.edu

<sup>3</sup> Section of Infectious Diseases, Department of Medicine, Boston Veterans Affairs Healthcare System and Boston University School of Medicine, Boston, MA 02118, USA; kalpana.gupta@va.gov

<sup>4</sup> Houston VA Center for Innovations in Quality, Effectiveness and Safety (IQuEST), Michael E. DeBakey Veterans Affairs Medical Center, Houston, TX 77030, USA; trautner@bcm.edu

<sup>5</sup> Section of Infectious Diseases, Departments of Medicine and Surgery, Baylor College of Medicine, Houston, TX 77030, USA; trautner@bcm.edu

\* Correspondence: mahansen@bcm.edu; Tel.: +1 (713) 798-0114

Received: 21 July 2020; Accepted: 24 August 2020; Published: date

**Table S1.** ICD-10 <sup>1</sup> code(s) for each diagnosis and symptom.

| Visit Classifications                                   | ICD-10 <sup>1</sup> Codes |
|---------------------------------------------------------|---------------------------|
| UTI Related Diagnoses                                   |                           |
| Cystitis                                                | N30                       |
| Acute Cystitis                                          | N30.0, N30.00, N30.01     |
| Other Chronic Cystitis                                  | N30.2, N30.20, N30.21     |
| Other Cystitis                                          | N30.8, N30.80, N30.81     |
| Cystitis Unspecified                                    | N30.9, N30.90, N30.91     |
| UTI (site not specified)                                | N39.0                     |
| Acute Pyelonephritis                                    | N10                       |
| Nonobstructive Reflux-Associated Chronic Pyelonephritis | N11.0                     |
| Chronic Obstructive Pyelonephritis                      | N11.1                     |
| Pyonephritis                                            | N13.6                     |
| UTI Related Symptoms                                    |                           |
| Pain Associated with Micturition                        | R30                       |
| Dysuria                                                 | R30.0                     |
| Frequency of Micturition                                | R35.0                     |
| Urgency of Urination                                    | R39.15                    |

<sup>1</sup> ICD-10 = International Classification of Disease, tenth edition.

**Table S2.** Visit diagnosis codes.

|                         | Overall<br><i>n</i> = 829 | Medicine <sup>1</sup><br><i>n</i> = 681 | Urology<br><i>n</i> = 148 | <i>p</i> -value <sup>2</sup> |
|-------------------------|---------------------------|-----------------------------------------|---------------------------|------------------------------|
| Acute cystitis          | 121 (11.3)                | 112 (12.1)                              | 9 (5.6)                   | 0.024                        |
| UTI, site not specified | 694 (63.9)                | 562 (60.6)                              | 132 (82.5)                | <0.001                       |
| Acute pyelonephritis    | 6 (0.6)                   | 4 (0.4)                                 | 2 (1.3)                   | 0.48                         |
| Other <sup>3</sup>      | 8 (0.8)                   | 3 (0.3)                                 | 5 (3.1)                   | <0.006                       |

<sup>1</sup>Medicine includes the departments of Family Medicine and Internal Medicine. <sup>2</sup>p-values refer to chi-square tests. <sup>3</sup>Other includes other chronic cystitis, other cystitis, and cystitis unspecified. No diagnosis codes for nonobstructive reflux-associated chronic pyelonephritis, chronic obstructive pyelonephritis, or pyonephrosis were found.

**Table S3.** Visit symptom codes.

|                                  | <b>Overall<br/>n = 1233</b> | <b>Medicine <sup>1</sup><br/>n = 1199</b> | <b>Urology<br/>n = 34</b> | <b>p-value<sup>2</sup></b> |
|----------------------------------|-----------------------------|-------------------------------------------|---------------------------|----------------------------|
| Pain associated with micturition | 524 (48.2)                  | 515 (55.6)                                | 9 (5.6)                   | <b>&lt;0.001</b>           |
| Dysuria                          | 523 (48.1)                  | 515 (55.6)                                | 8 (5.0)                   | <b>&lt;0.001</b>           |
| Frequency of micturition         | 155 (14.3)                  | 147 (15.9)                                | 8 (5.0)                   | <b>&lt;0.001</b>           |
| Urgency of urination             | 31 (2.9)                    | 22 (2.4)                                  | 9 (5.6)                   | <b>0.043</b>               |

<sup>1</sup>Medicine includes the departments of Family Medicine and Internal Medicine. <sup>2</sup>p-values refer to chi-square tests.

**Table S4.** Number of visits.

|   | <b>Frequency</b> | <b>Percent</b> | <b>Cumulative Frequency</b> | <b>Cumulative Percent</b> |
|---|------------------|----------------|-----------------------------|---------------------------|
| 1 | 800              | 86.67          | 800                         | 86.01                     |
| 2 | 97               | 10.51          | 897                         | 97.18                     |
| 3 | 20               | 2.17           | 917                         | 99.35                     |
| 4 | 1                | 0.11           | 918                         | 99.46                     |
| 5 | 3                | 0.33           | 921                         | 99.79                     |
| 7 | 2                | 0.22           | 923                         | 100.00                    |
